# Supplementary material
Source: PubMed Central journal article supplement (PMC3461897)
Supplement: JCI44421sd.pdf [file JCI44421sd.pdf]

**Supplemental Data Table 1.** Clinical characteristics of obese males (BMI 35+, all with waist 40 inches or more) selected to have 0-1 elements in addition to obesity (“Not MetS”) or all elements of MetS (“With MetS”). P-values determined by Student’s t-test (with log of ferritin and triglycerides utilized for significance testing).

| Variable              | Not MetS |                | With MetS |                 | p value |
|-----------------------|----------|----------------|-----------|-----------------|---------|
|                       | N        | Mean $\pm$ SEM | N         | Mean $\pm$ SEM  |         |
| Age                   | 67       | 41.9 $\pm$ 1.4 | 58        | 52.1 $\pm$ 1.3  | <.0001  |
| BMI                   | 67       | 39.6 $\pm$ 0.7 | 58        | 39.7 $\pm$ 0.6  | 0.9     |
| Weight (kg)           | 67       | 126 $\pm$ 2    | 58        | 126 $\pm$ 2     | 0.98    |
| Waist (cm)            | 56       | 126 $\pm$ 1    | 43        | 128 $\pm$ 1     | 0.5     |
| Height (cm)           | 67       | 178 $\pm$ 1    | 58        | 178 $\pm$ 1     | 0.9     |
| Hypertension (%)      | 67       | 24             | 58        | 78              | <.0001  |
| Diastolic BP (mm Hg)  | 67       | 78.2 $\pm$ 1.3 | 58        | 85.9 $\pm$ 1.7  | 0.0004  |
| Systolic BP (mm Hg)   | 67       | 128 $\pm$ 2    | 58        | 144 $\pm$ 2     | <.0001  |
| Diabetes (%)          | 67       | 0              | 58        | 55              | <.0001  |
| Glucose               | 67       | 85.0 $\pm$ 1.1 | 58        | 139.7 $\pm$ 6.6 | <.0001  |
| Total Chol (mg/dl)    | 67       | 183 $\pm$ 4    | 58        | 182 $\pm$ 3     | 0.7     |
| Triglycerides (mg/dl) | 67       | 133 $\pm$ 5    | 58        | 262 $\pm$ 12    | <.0001  |
| HDL-C (mg/dl)         | 67       | 43.0 $\pm$ 1.0 | 58        | 31.6 $\pm$ 0.6  | <.0001  |
| LDL-C (mg/dl)         | 67       | 114 $\pm$ 3    | 58        | 97 $\pm$ 4      | 0.0009  |
| ALT                   | 66       | 44.1 $\pm$ 3.0 | 55        | 45.4 $\pm$ 3.0  | 0.8     |
| AST                   | 67       | 30.4 $\pm$ 1.4 | 58        | 30.7 $\pm$ 1.6  | 0.9     |
| GGTP                  | 67       | 54.0 $\pm$ 6.4 | 58        | 43.6 $\pm$ 3.1  | 0.14    |
| Uric acid (mg/dl)     | 67       | 7.0 $\pm$ 0.2  | 58        | 6.9 $\pm$ 0.2   | 0.7     |
| Insulin               | 48       | 17.9 $\pm$ 1.7 | 41        | 32.1 $\pm$ 6.4  | 0.037   |
| HOMA-IR               | 48       | 1500 $\pm$ 136 | 41        | 4513 $\pm$ 927  | 0.0025  |
| Adiponectin           | 19       | 18.9 $\pm$ 1.9 | 19        | 11.5 $\pm$ 1.0  | 0.0021  |
| Ferritin              | 67       | 185 $\pm$ 21   | 58        | 260 $\pm$ 23    | 0.0095  |

**Supplemental data Table 2:** Study subjects in phlebotomy trial.

|                           | <b>Pre-phlebotomy</b> | <b>Post-phlebotomy</b> |
|---------------------------|-----------------------|------------------------|
| Age                       | 52.3 ± 2.1            | 52.7 ± 1.8             |
| Glucose tolerance status  | IFG: 3/3<br>IGT: 3/3  | IFG: 1/3<br>IGT: 1/3   |
| BMI (kg/m <sup>2</sup> )  | 35.8 ± 1.7            | 37.3 ± 3.4             |
| Serum ferritin (ng/mL)    | 221 ± 42              | 33 ± 12 *              |
| Fasting glucose (mg/dl)   | 118 ± 5               | 106 ± 3                |
| 2h OGTT glucose (mg/dl)   | 163 ± 2               | 146 ± 14               |
| Serum adiponectin (μg/mL) | 10.3 ± 4.1            | 11.7 ± 4.2 *           |

All values are mean ± SEM. \* p<0.02 by paired t-test
